# Supplementary material for: Fast myosin binding protein C knockout in skeletal muscle alters length-dependent activation and myofilament structure
Source: PubMed Central journal article supplement (PMC11130249; doi:10.1038/s42003-024-06265-8), 2024-05-27
Supplement: 42003_2024_6265_MOESM2_ESM.pdf [file 42003_2024_6265_MOESM2_ESM.pdf]

## Supplementary Information for

### Fast myosin binding protein C knockout in skeletal muscle alters length-dependent activation and myofilament structure.

Anthony L. Hessel<sup>1\*</sup>, Michel N. Kuehn<sup>1</sup>, Seong-Won Han<sup>1</sup>, Weikang Ma<sup>2</sup>, Thomas C. Irving<sup>2</sup>, Brent A. Momb<sup>3</sup>, Taejeong Song<sup>4</sup>, Sakthivel Sadayappan<sup>4</sup>, Wolfgang A. Linke<sup>1</sup>, Bradley M. Palmer<sup>5\*</sup>.

<sup>1</sup>Institute of Physiology II, University of Muenster; Muenster, Germany.

<sup>2</sup>BioCAT, Department of Biology, Illinois Institute of Technology; Chicago, USA.

<sup>3</sup>Department of Kinesiology, University of Massachusetts – Amherst; Amherst, MA, USA.

<sup>4</sup>Center for Cardiovascular Research, Division of Cardiovascular Health and Disease, Department of Internal Medicine, University of Cincinnati, Cincinnati, OH, USA

<sup>5</sup> Department of Molecular Physiology and Biophysics, University of Vermont; Burlington, VT, USA.

\*Corresponding authors Anthony L. Hessel and Bradley M. Palmer

**Email:** [anthony.hessel@uni-muenster.de](mailto:anthony.hessel@uni-muenster.de), [Bradley.palmer@uvm.edu](mailto:Bradley.palmer@uvm.edu)

The PDF file includes:

Supplementary Figures 1-2

Supplementary Figures

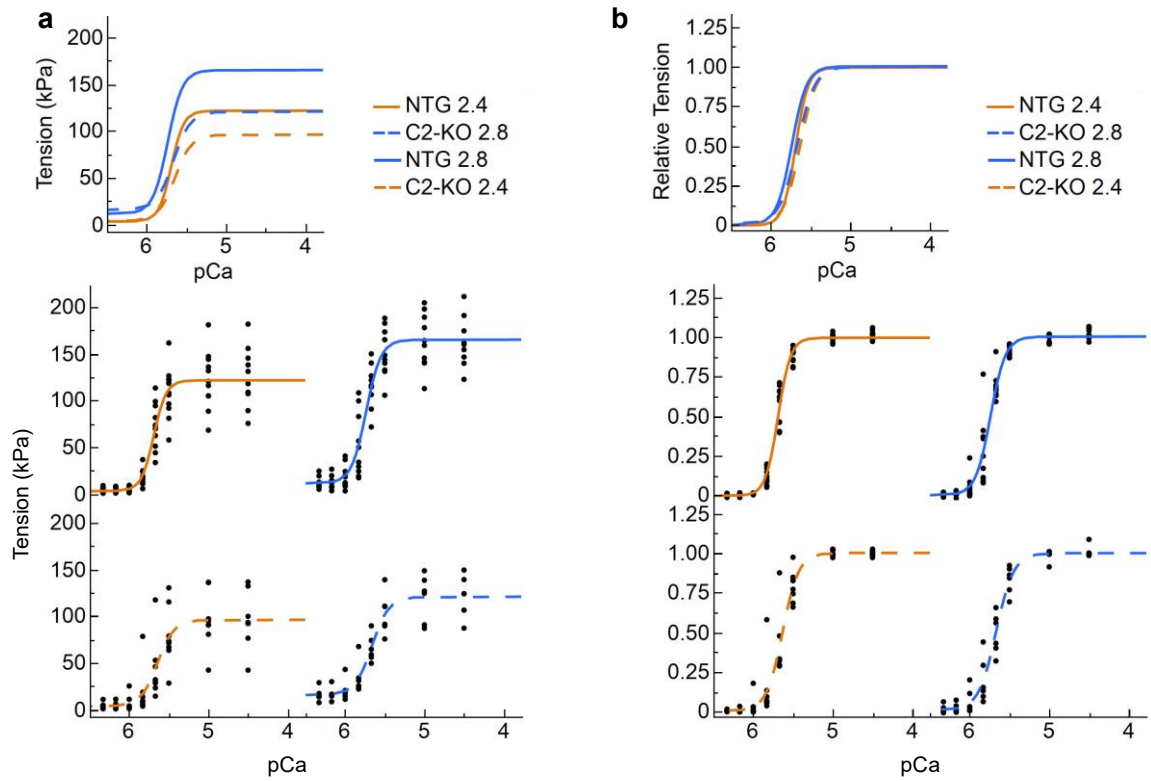

**Supplementary Figure 1. Tension-pCa plots of NTG (solid lines) and C2<sup>-/-</sup> (dotted lines) at 2.4 (orange) and 2.8 (blue) μm SL. Also included are the individual data points for each condition in absolute (a) and relative (b) tension. Contains n = 6-10 per condition.**

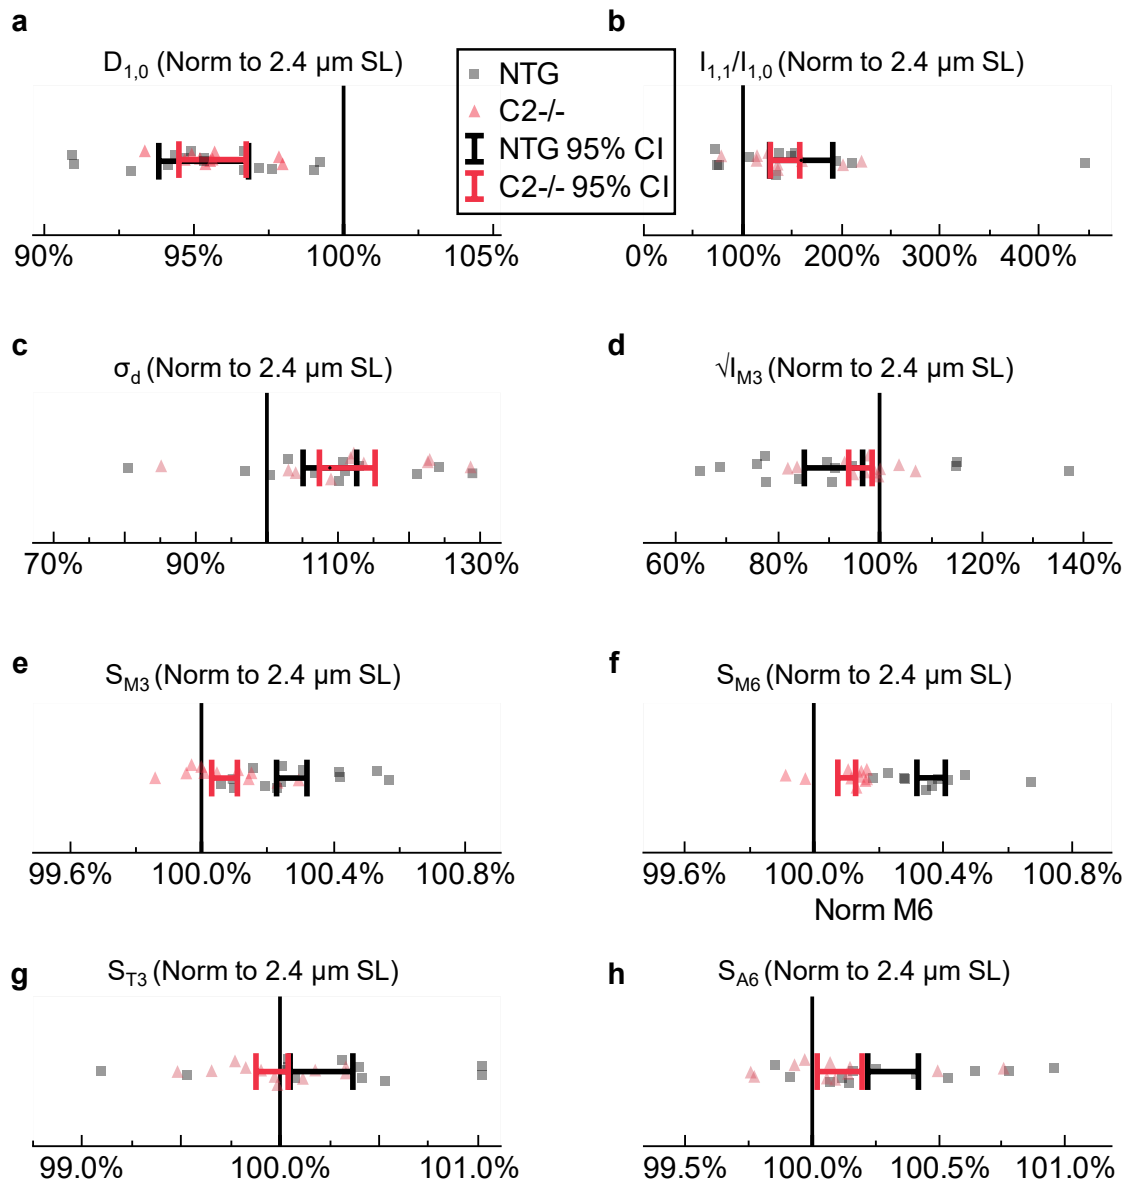

**Supplementary Figure 2. Stretch-related relative change in structural features at 2.8  $\mu\text{m}$  SL, normalized to 2.4  $\mu\text{m}$  SL, for NTG (black squares) and C2<sup>-/-</sup> (red triangles) genotypes. (a-h) structural data presented as mean  $\pm$  95% confidence interval of the mean. 100% is the initial starting value for each sample at 2.4  $\mu\text{m}$  SL.**
