# Supplementary material for: Fast myosin binding protein C knockout in skeletal muscle alters length-dependent activation and myofilament structure
Source: PubMed Central journal article supplement (PMC11130249; doi:10.1038/s42003-024-06265-8), 2024-05-27
Supplement: 42003_2024_6265_MOESM3_ESM.pdf [file 42003_2024_6265_MOESM3_ESM.pdf]

## Description of Additional Supplementary Files

**File name:** Supplementary Data 1

**Description:** The source data for all the figures and plots in the manuscript.
